# Supplementary material for: Bisubstituted-biquinoline Cu(i) complexes: synthesis, mesomorphism and photophysical studies in solution and condensed states
Source: Royal Society of Chemistry journal article supplement (doi:10.1039/c8tc02999g), 2018-01-01
Supplement: c8tc02999g1.pdf [file c8tc02999g1.pdf]

## Supplementary Information for

### Bisubstituted-Biquinoline Cu(I) complexes: synthesis, mesomorphism and photophysical studies in solution and condensed states

C. Cretu,<sup>a</sup> A. A. Andelescu,<sup>a</sup> A. Candreva,<sup>b</sup> A. Crispini\*<sup>b</sup>, E. I. Szerb\*<sup>a</sup> and M. La Deda<sup>b</sup>

<sup>a</sup> Institute of Chemistry of Romanian Academy, 24 Mihai Viteazu Blvd., 300223, Timisoara, Romania

<sup>b</sup> MAT-INLAB (Laboratorio di Materiali Molecolari Inorganici), Dipartimento di Chimica e Tecnologie Chimiche, Università della Calabria, 87036 Arcavacata di Rende (CS), Italy

#### Contents:

Figure S1: DSC trace of complex **CuL2\_ClO<sub>4</sub>**

Figure S2: DSC trace of complex **CuL2\_BF<sub>4</sub>**

Figure S3: DSC trace of complex **CuL3\_ClO<sub>4</sub>**

Figure S4: DSC trace of complex **CuL3\_BF<sub>4</sub>**

Figure S5: X-ray powder diffraction patterns of complex **CuL2\_BF<sub>4</sub>**

Figure S6: X-ray powder diffraction patterns of complex **CuL2\_ClO<sub>4</sub>**

Figure S7: Absorption of ligand **L2**

Figure S8: Absorption of ligand **L3**

Figure S9: Emission spectra of the ligands **L2** and **L3** in dichloromethane solution

Figure S10: Absorption spectrum of **CuL2\_ClO<sub>4</sub>** in dichloromethane solution

Figure S11: Absorption spectrum of **CuL3\_ClO<sub>4</sub>** in dichloromethane solution

Figure S12: Absorption spectrum of **CuL3\_BF<sub>4</sub>** in dichloromethane solution

Figure S13: Emission spectrum of **CuL2\_X** in the solid state, at r.t.

Figure S14: Emission spectrum of **CuL3\_X** in the solid state, at r.t.

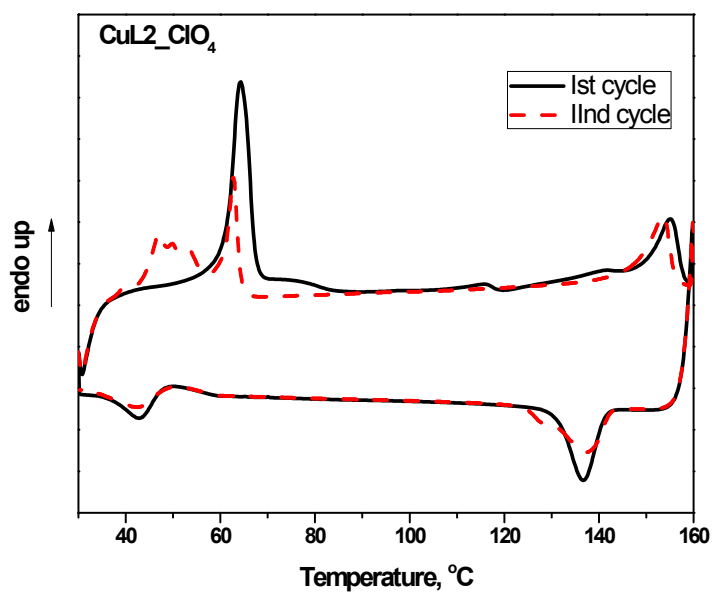

**Figure S1.** First and second cycle DSC traces of complex  $\text{CuL2\_ClO}_4$  obtained with a heating-cooling rate of  $10^\circ\text{C}/\text{min}$ .

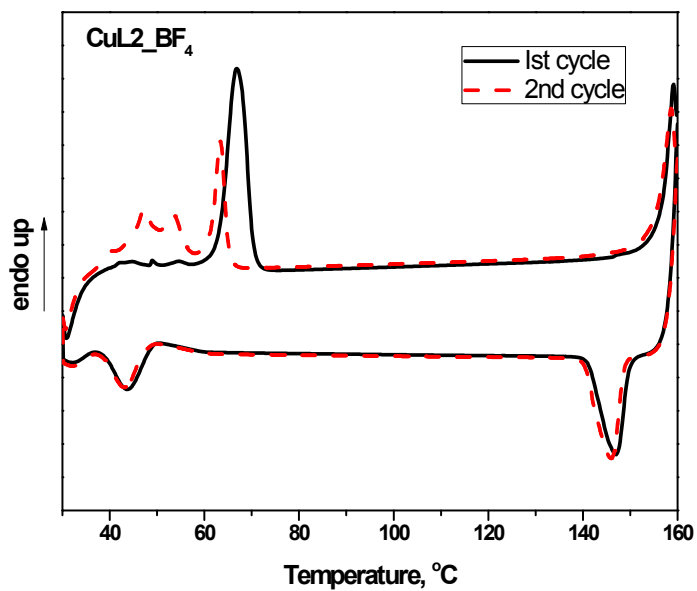

**Figure S2.** First and second cycle DSC traces of complex  $\text{CuL2\_BF}_4$  obtained with a heating-cooling rate of  $10^\circ\text{C}/\text{min}$ .

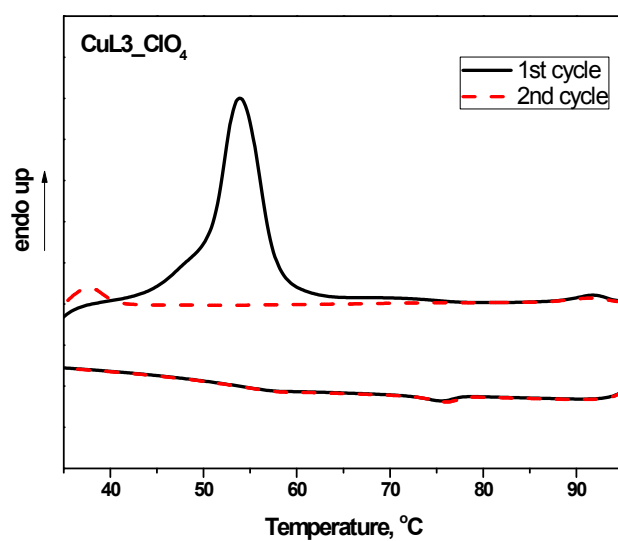

**Figure S3.** First and second cycle DSC traces of complex  $\text{CuL3\_ClO}_4$  obtained with a heating-cooling rate of  $10^\circ\text{C}/\text{min}$ .

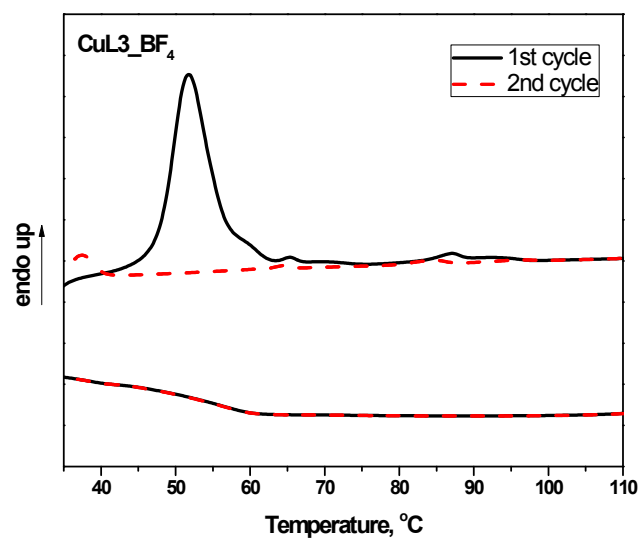

**Figure S4.** First and second cycle DSC traces of complex  $\text{CuL3\_BF}_4$  obtained with a heating-cooling rate of  $10^\circ\text{C}/\text{min}$ .

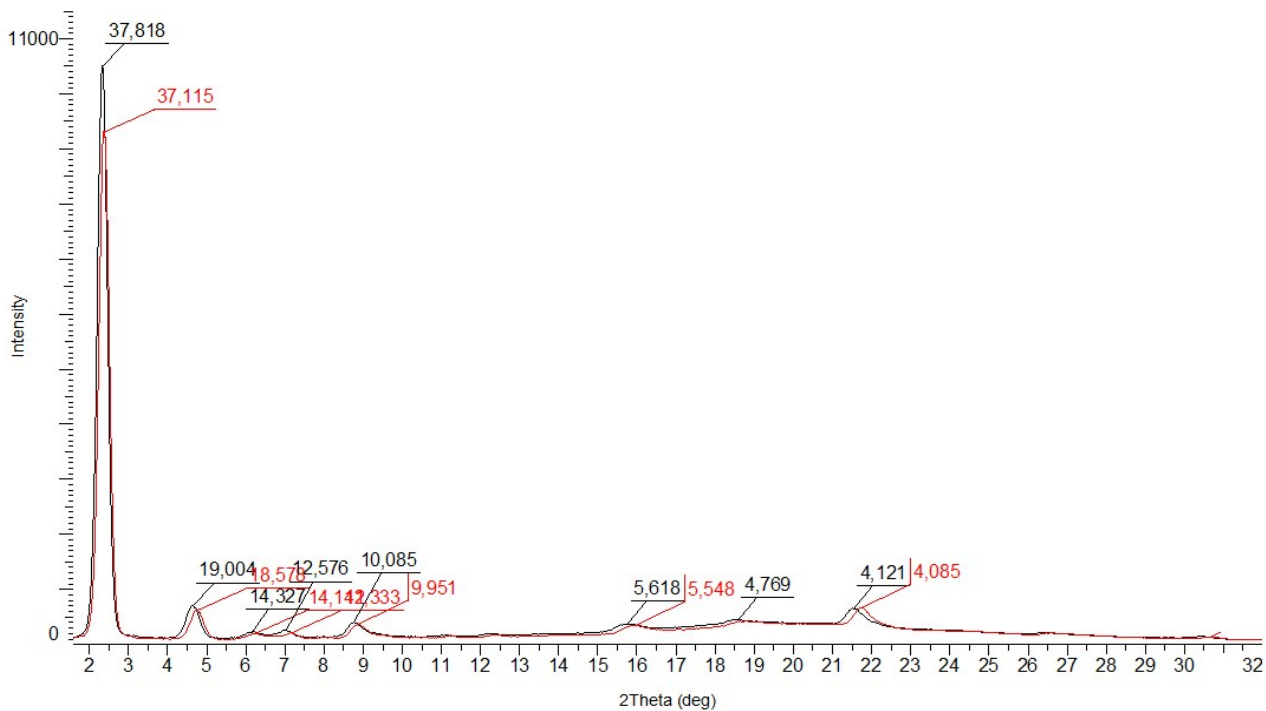

**Figure S5.** X-ray powder diffraction patterns of complex  $\text{CuL2\_BF}_4$  recorded on heating in the II cycle at 75 °C (red trace) and at 135 °C (black trace)

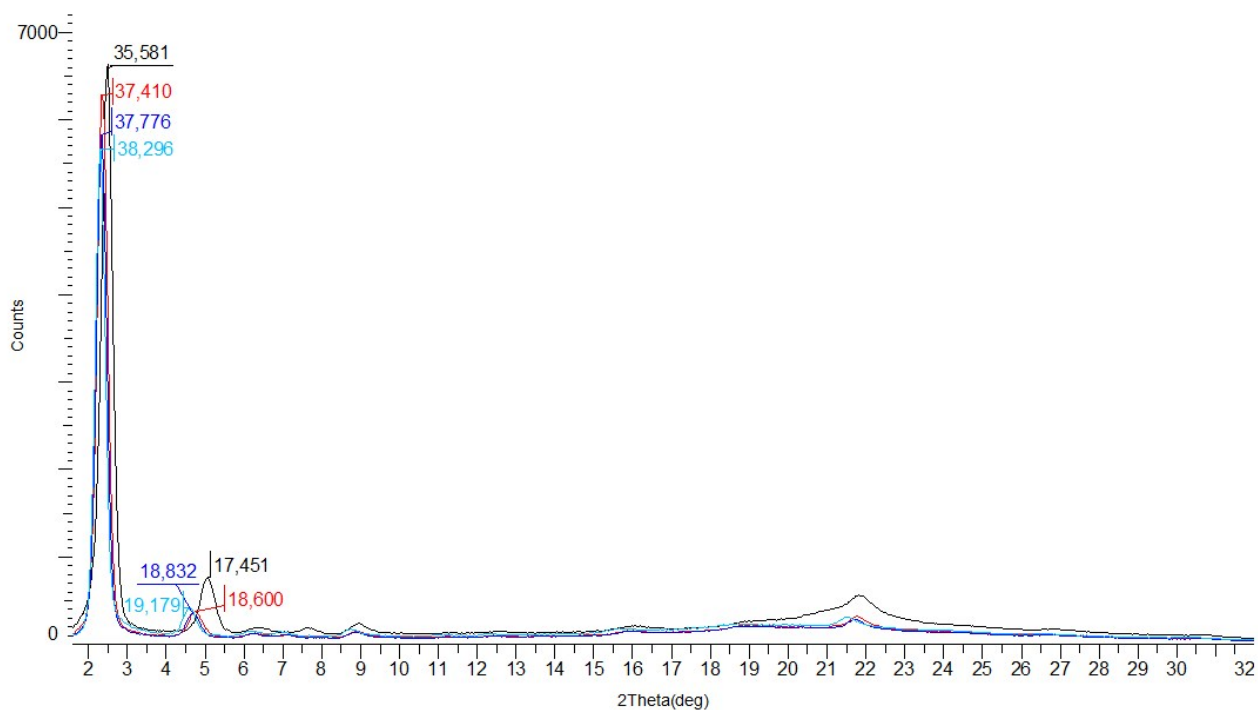

**Figure S6:** X-ray powder diffraction patterns of complex  $\text{CuL2\_ClO}_4$  recorded on heating in the II cycle at r.t. (black trace), 57° (red trace) , 70 °C (blue trace) and 130 °C (sky-blue trace)

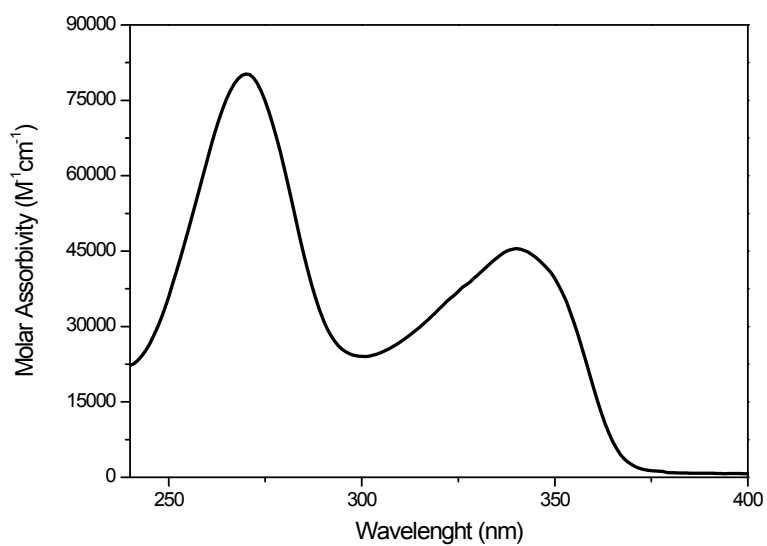

**Figure S7.** Absorption spectrum of **L2** in dichloromethane solution

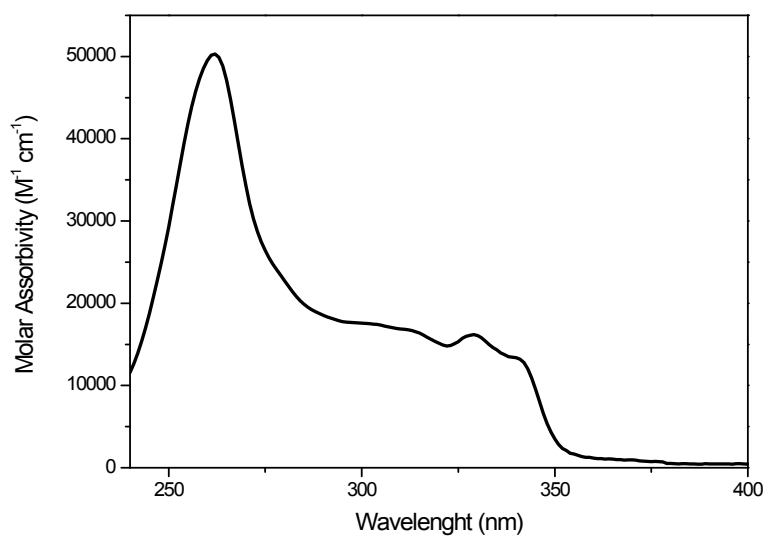

**Figure S8.** Absorption spectrum of **L3** in dichloromethane solution

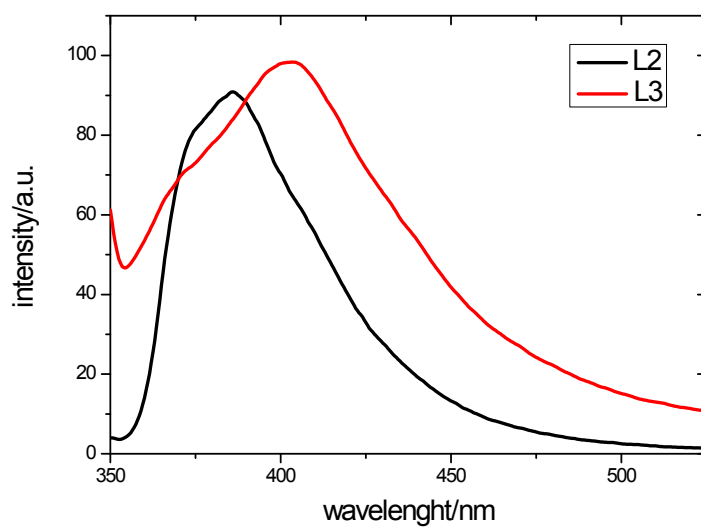

**Figure S9.** Emission spectra of the ligands L2 and L3 in dichloromethane solution

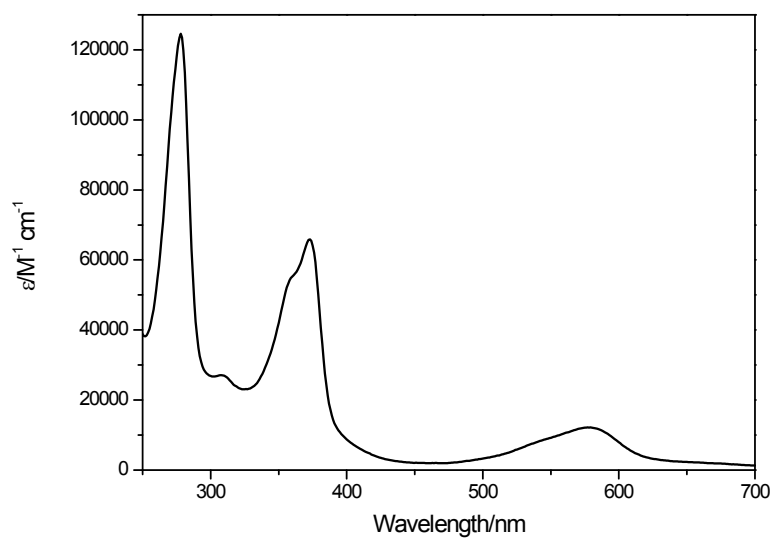

**Figure S10.** Absorption spectrum of **CuL2·ClO4** in dichloromethane solution

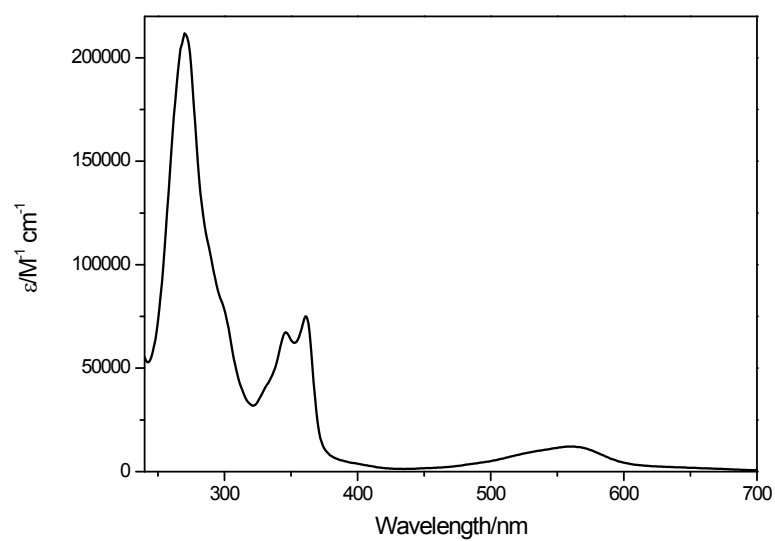

**Figure S11.** Absorption spectrum of **CuL3\_ClO4** in dichloromethane solution

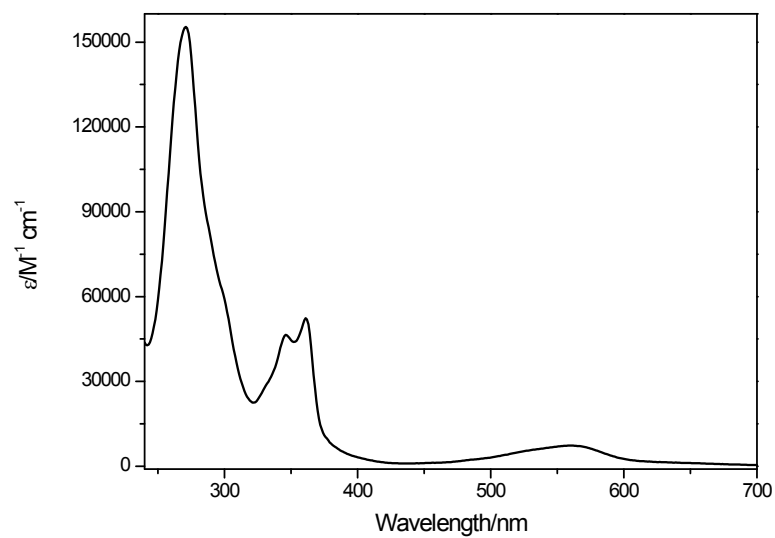

**Figure S12.** Absorption spectrum of **CuL3\_BF4** in dichloromethane solution

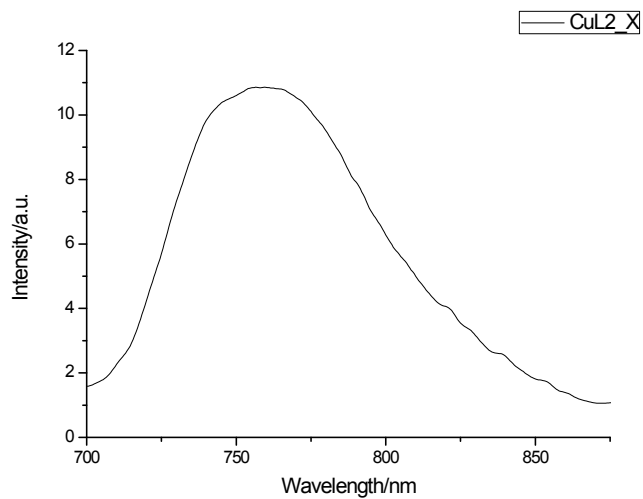

**Figure S13.** Emission spectrum of **CuL2\_X** from a solid sample at room temperature ( $\lambda_{\text{ex}} = 570 \text{ nm}$ ).

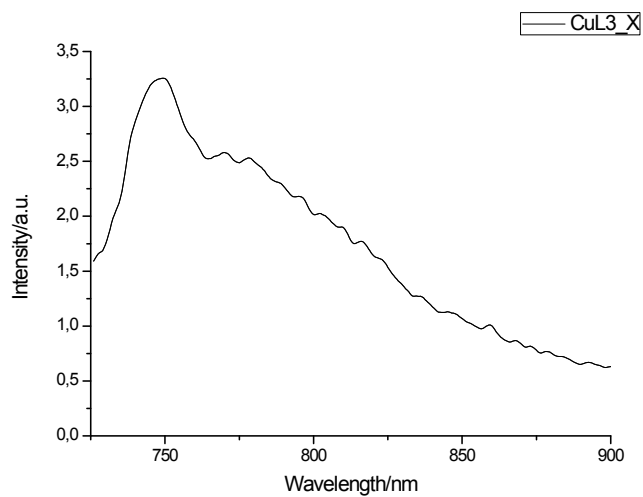

**Figure S14.** Emission spectrum of **CuL3\_X** from a solid sample at room temperature ( $\lambda_{\text{ex}} = 570 \text{ nm}$ ).
